# Supplementary material for: Site-Directed Mutants of Parasporin PS2Aa1 with Enhanced Cytotoxic Activity in Colorectal Cancer Cell Lines
Source: MDPI journal article supplement (doi:10.3390/molecules27217262), 2022-10-26
Supplement: s1 [file s1]

# Site-directed mutants of parasporin PS2Aa1 with enhanced cytotoxic activity in colorectal cancer cell lines

Miguel Orlando Suárez-Barrera<sup>1,3</sup>, Lydia Visser<sup>1</sup>, Efraín Hernando Pinzón-Reyes<sup>2</sup>, Paola Rondón-Villarreal<sup>2</sup>, Juan Sebastián Alarcon-Aldana<sup>2</sup>, Nohora Juliana Rueda-Forero<sup>2\*</sup>.

1. Department of Pathology and Medical Biology, University of Groningen, University Medical Center Groningen, University of Groningen, The Netherlands.

2. Facultad de Ciencias Médicas y de la Salud, Instituto de Investigación Masira, Universidad de Santander.

3. Max Planck Tandem Group in Nanobioengineering, institute of Chemistry, Faculty of Natural and Exact sciences, University of Antioquia.

\*Juliana.forero@udes.edu.co

## Supplementary information

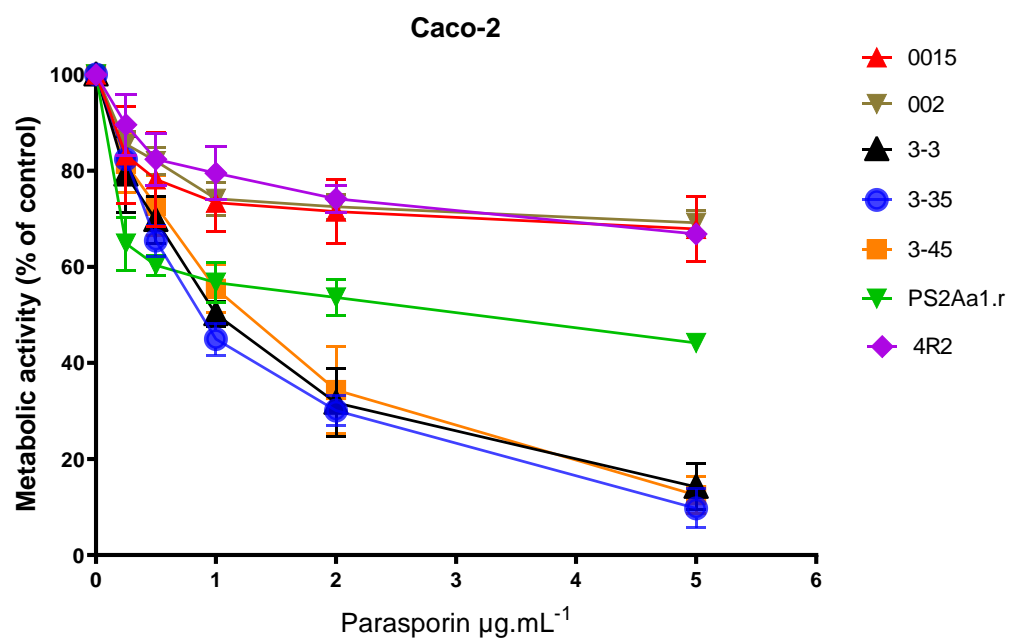

**Figure S1:** Cytocidal activities of variants of Parasporin 2 (PS2Aa1) obtained with site directed mutagenesis to CaCo2 cell lines. the toxin activated with proteinase K was added (final concentrations, 0.2µg/mL to 5µg/mL).

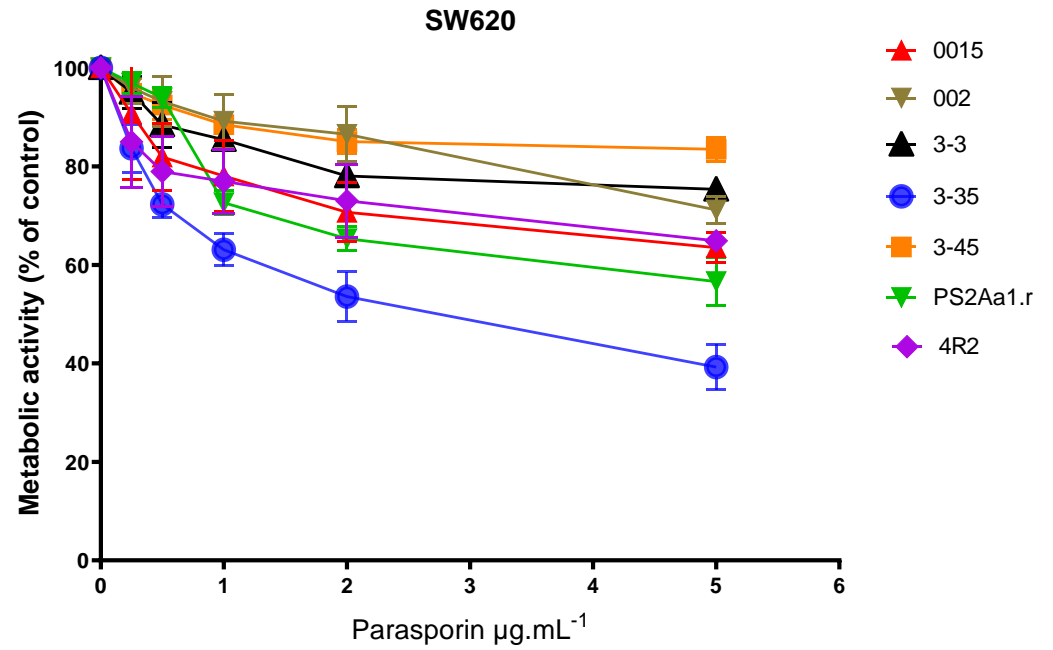

**Figure S2:** Cytocidal activities of variants of Parasporin 2 (PS2Aa1) obtained with site directed mutagenesis to SW620 cell lines. the toxin activated with proteinase K was added (final concentrations, 0.2 $\mu\text{g/mL}$  to 5 $\mu\text{g/mL}$ ).

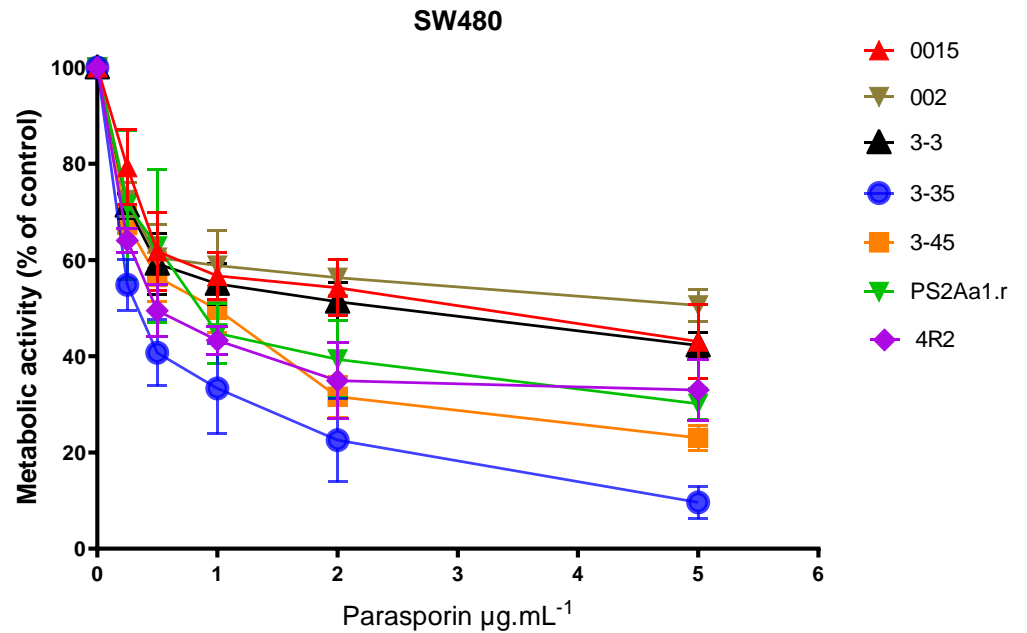

**Figure S3:** Cytocidal activities of variants of Parasporin 2 (PS2Aa1) obtained with site directed mutagenesis to SW480 cell lines. the toxin activated with proteinase K was added (final concentrations, 0.2 $\mu\text{g/mL}$  to 5 $\mu\text{g/mL}$ ).

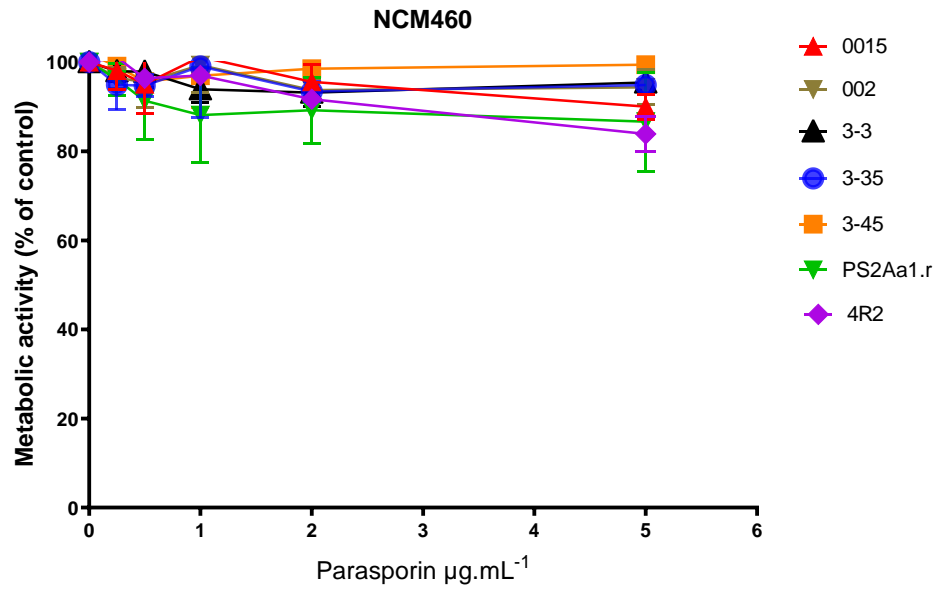

**Figure S4:** Cytocidal activities of variants of Parasporin 2 (PS2Aa1) obtained with site directed mutagenesis to NCM460 cell lines. the toxin activated with proteinase K was added (final concentrations, 0.2 $\mu\text{g/mL}$  to 5 $\mu\text{g/mL}$ ).
